# Supplementary material for: Shallow groundwater thermal sensitivity to climate change and land cover disturbances: derivation of analytical expressions and implications for stream temperature modeling
Source: Copernicus journal article supplement (doi:10.5194/hess-19-2469-2015), 2015-05-26
Supplement: Supplementary file 1 [file hess-19-2469-2015-supplement.zip]

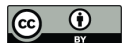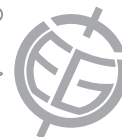

## *Supplement of*

# **Shallow groundwater thermal sensitivity to climate change and land cover disturbances: derivation of analytical expressions and implications for stream temperature modeling**

**B. L. Kurylyk et al.**

*Correspondence to:* B. L. Kurylyk ([barret.kurylyk@unb.ca](mailto:barret.kurylyk@unb.ca))

- [hess-19-2469-2015-supplement-cover-letter.pdf](#)
- Supplement
  - [Supplementary material.xlsx](#)

The copyright of individual parts of the supplement might differ from the CC-BY 3.0 licence.
